# Supplementary material for: Artificial intelligence–enabled virtual screening of ultra-large chemical libraries with deep docking
Source: Springer Nature journal article supplement (doi:10.1038/s41596-021-00659-2), 2022-02-04
Supplement: MOESM3 [file 41596_2021_659_MOESM3_ESM16.xlsx]

## Sheet: Supplementary_Table_3
train_sample_size	recall_test	prec_test	left_test
100000	0.903188	0.02314	388066404
250000	0.901296	0.0288214	3.10917e+08
400000	0.904644	0.0320608	2.8054e+08
550000	0.900568	0.0346244	2.58598e+08
700000	0.901005	0.0376371	238014119
